# Supplementary material for: Dihydromyrcenol Modulates Involucrin Expression through the Akt Signaling Pathway
Source: MDPI journal article supplement (doi:10.3390/ijms25042246), 2024-02-13
Supplement: s1 [file s1]

**Supplementary Table S1.** Primer sequences for RT-qPCR

| Gene description                                             | Sequence (5'→3')                                          |
|--------------------------------------------------------------|-----------------------------------------------------------|
| Filaggrin                                                    | F: AAGCACAGAAAGCACAGTCATC<br>R: TTCTCTTGGGCTCTTGGATCTTC   |
| Involucrin                                                   | F: TATTTCCGGGTCCGCTAGGTG<br>R: ATTGGGGTCATTGGGGTTGG       |
| Loricrin                                                     | F: CCTACCTGGAAGAAGCCATTGAG<br>R: ACAGAAACCAAAGAGGCTAAACAG |
| Sp1                                                          | F: GGTTCGCTTGCCTCGTCAG<br>R: GATCTTGGTCGCTCATGGTGG        |
| Glyceraldehyde-3-phosphate dehydrogenase<br>( <i>GAPDH</i> ) | F: TCTGGAAAGCTGTGGCGTGA<br>R: TACTTGGCAGGTTTCTCCAGG       |
